# Supplementary material
Source: Springer Nature journal article supplement (https://www.springermedizin.de/resource/supplementary/12913_2013_3504_MOESM5_ESM.pdf/9533040)
Supplement: MOESM5 [file 9533040]

**Number of pregnant women referred per month**

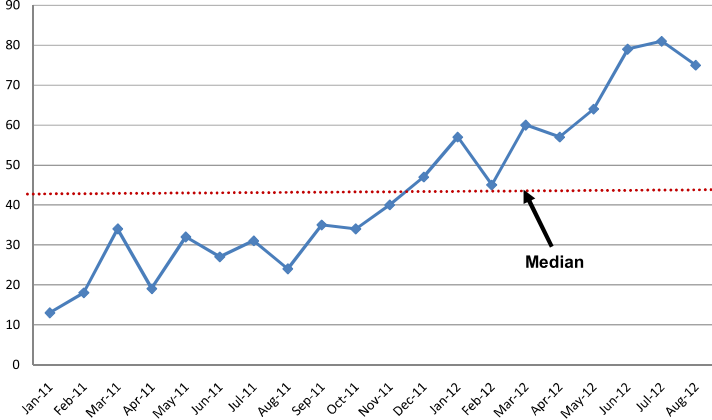

|                                                                                                      | Jan-11 | Feb-11 | Mar-11 | Apr-11 | May-11 | Jun-11 | Jul-11 | Aug-11 | Sep-11 | Oct-11 | Nov-11 | Dec-11 | Jan-12 | Feb-12 | Mar-12 | Apr-12 | May-12 | Jun-12 | Jul-12 | Aug-12 |
|------------------------------------------------------------------------------------------------------|--------|--------|--------|--------|--------|--------|--------|--------|--------|--------|--------|--------|--------|--------|--------|--------|--------|--------|--------|--------|
| ◆ # of pregnant women referred to the health facility by community representative (e.g. by CHW, TBA) | 13     | 18     | 34     | 19     | 32     | 27     | 31     | 24     | 35     | 34     | 40     | 47     | 57     | 45     | 60     | 57     | 64     | 79     | 81     | 75     |
